# Supplementary material for: Engineering anisotropic cardiac monolayers on microelectrode arrays for non-invasive analyses of electrophysiological properties
Source: Royal Society of Chemistry journal article supplement (doi:10.1039/c9an01339c), 2019-10-22
Supplement: c9an01339c1.pdf [file c9an01339c1.pdf]

## Supplementary Information

### **Engineering Anisotropic Cardiac Monolayers on Microelectrode Arrays for Non-invasive Analyses of Electrophysiological Properties**

Ahmad Alassaf, Gulistan Tansik, Vera Mayo, Laura Wubker, Daniel Carbonero, Ashutosh Agarwal

Department of Biomedical Engineering

University of Miami

1251 Memorial Dr, MEA 203

Coral Gables, FL 33146

\*Email: [A.agarwal2@miami.edu](mailto:A.agarwal2@miami.edu)

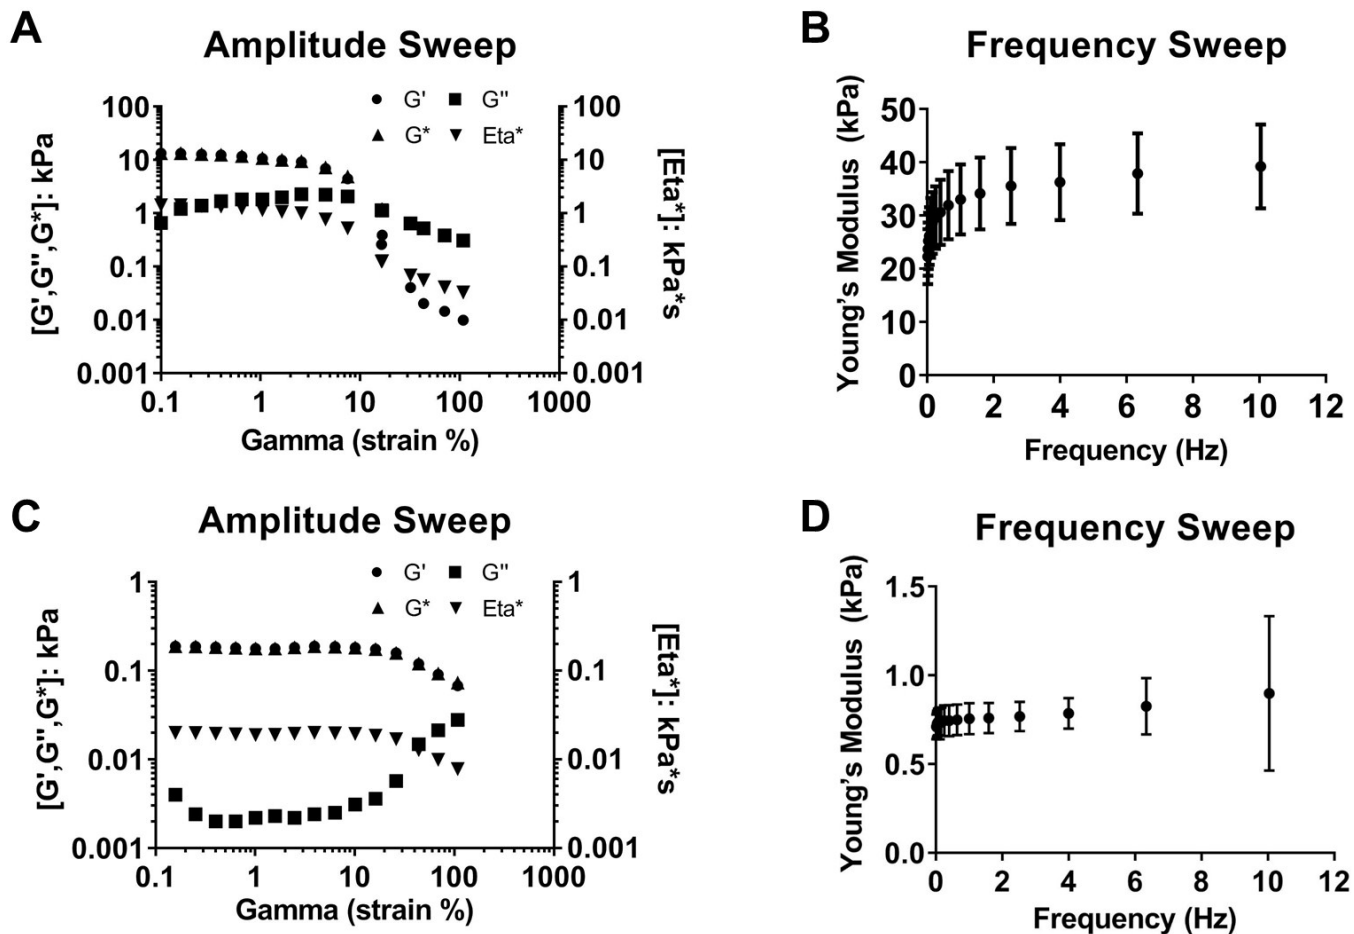

**Supplementary Figure 1. Rheological properties of gelatin hydrogels in two different concentrations (20% and 2%).** A) The amplitude dependence of  $G'$ ,  $G''$ ,  $G^*$  and  $\text{Eta}^*$  of 20% gelatin hydrogels. The linear viscoelastic range of 20% gelatin hydrogels was determined from amplitude sweep test. B) Young's modulus of 20% gelatin hydrogels was determined from frequency sweeps performed at a constant strain of 0.5% ( $n = 6$ , mean  $\pm$  SEM). C) The amplitude dependence of storage modulus ( $G'$ ), loss modulus ( $G''$ ), complex shear modulus ( $G^*$ ) and viscosity ( $\text{Eta}^*$ ) of 2% gelatin hydrogels. The linear viscoelastic range of 2% gelatin hydrogels was determined from amplitude sweep test. D) Young's modulus of 2% gelatin hydrogels was determined from frequency sweeps performed at a constant strain of 0.5% ( $n = 4$ , mean  $\pm$  SEM).

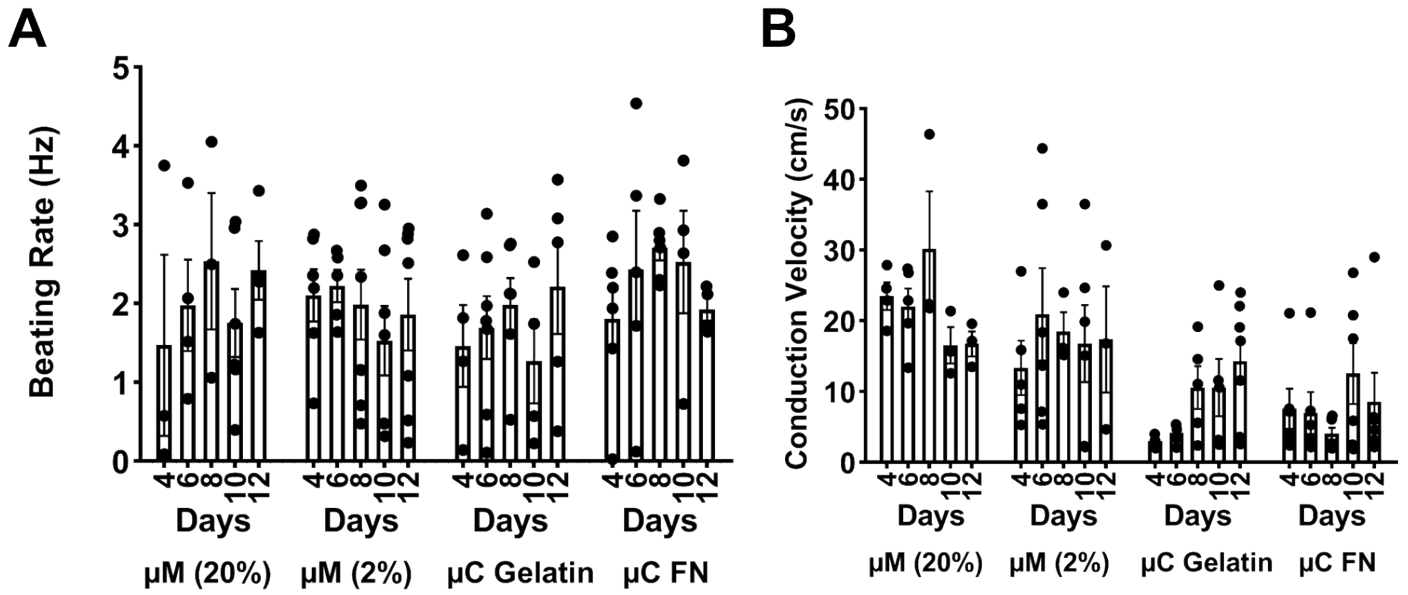

**Supplementary Figure 2. Individual observation for each substrate.** A) Beating rate (Hz) differences between the different days for each substrate. B) Conduction velocity (cm/s) differences between the different days for each substrate.

**A**  $\mu\text{M}$  (2%)

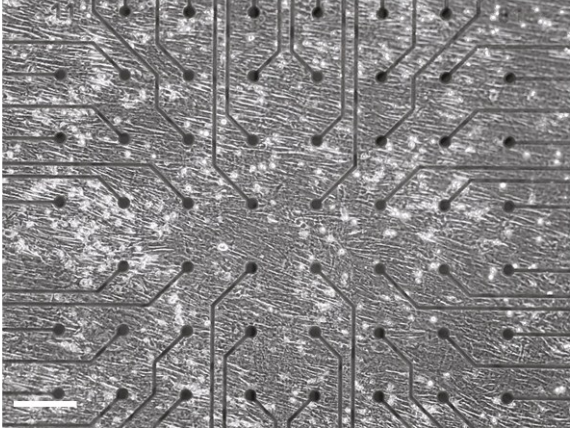

**B**  $\mu\text{C}$  Fibronectin

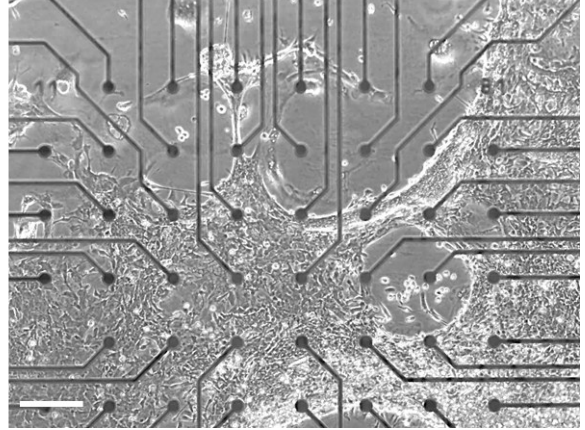

**Supplementary Figure 3.** Bright field images on day 12 for A)  $\mu\text{M}$  2% hydrogel, and B)  $\mu\text{C}$  fibronectin to check delamination and pick only the electrodes that were covered with cardiomyocytes for recording. Scale bar represents 200 $\mu\text{m}$ .

### The Beating Rate (Hz) for 12 Days

**A**

| Day    | $\mu\text{M}$ (20%) |      |               | $\mu\text{M}$ (2%) |      |               | $\mu\text{C}$ Gelatin |      |               | $\mu\text{C}$ Fibronectin |      |               |
|--------|---------------------|------|---------------|--------------------|------|---------------|-----------------------|------|---------------|---------------------------|------|---------------|
|        | Average (Hz)        | SEM  | Number of MEA | Average (Hz)       | SEM  | Number of MEA | Average (Hz)          | SEM  | Number of MEA | Average (Hz)              | SEM  | Number of MEA |
| Day 4  | 1.47                | 0.48 | 3             | 2.10               | 0.17 | 6             | 1.85                  | 0.15 | 4             | 1.89                      | 0.10 | 6             |
| Day 6  | 1.98                | 0.17 | 4             | 2.29               | 0.07 | 5             | 1.58                  | 0.25 | 7             | 2.51                      | 0.13 | 5             |
| Day 8  | 2.17                | 0.26 | 3             | 1.99               | 0.12 | 8             | 1.98                  | 0.13 | 6             | 2.71                      | 0.24 | 6             |
| Day 10 | 2.07                | 0.15 | 6             | 1.50               | 0.05 | 7             | 1.27                  | 0.26 | 4             | 2.57                      | 0.22 | 4             |
| Day 12 | 2.42                | 0.14 | 4             | 1.88               | 0.06 | 7             | 2.40                  | 0.17 | 5             | 1.92                      | 0.21 | 4             |

### The Beating Interval (s) for 12 Days

**B**

| Day    | $\mu\text{M}$ (20%) |      |               | $\mu\text{M}$ (2%) |      |               | $\mu\text{C}$ Gelatin |      |               | $\mu\text{C}$ Fibronectin |      |               |
|--------|---------------------|------|---------------|--------------------|------|---------------|-----------------------|------|---------------|---------------------------|------|---------------|
|        | Average (s)         | SEM  | Number of MEA | Average (s)        | SEM  | Number of MEA | Average (s)           | SEM  | Number of MEA | Average (s)               | SEM  | Number of MEA |
| Day 4  | 0.60                | 0.01 | 3             | 0.79               | 0.01 | 5             | 2.78                  | 0.47 | 3             | 2.38                      | 0.28 | 5             |
| Day 6  | 0.44                | 0.02 | 5             | 0.51               | 0.01 | 7             | 1.52                  | 0.26 | 5             | 0.68                      | 0.05 | 6             |
| Day 8  | 0.57                | 0.02 | 2             | 1.03               | 0.02 | 6             | 0.54                  | 0.02 | 4             | 0.48                      | 0.01 | 5             |
| Day 10 | 3.02                | 0.22 | 3             | 2.00               | 0.04 | 6             | 4.02                  | 0.40 | 4             | 0.51                      | 0.04 | 4             |
| Day 12 | 2.50                | 0.50 | 3             | 1.17               | 0.02 | 3             | 1.05                  | 0.04 | 5             | 1.44                      | 0.14 | 5             |

### The Coefficient of Variation (%) for 12 Days

**C**

| Day    | $\mu\text{M}$ (20%) |      |               | $\mu\text{M}$ (2%) |      |               | $\mu\text{C}$ Gelatin |      |               | $\mu\text{C}$ Fibronectin |      |               |
|--------|---------------------|------|---------------|--------------------|------|---------------|-----------------------|------|---------------|---------------------------|------|---------------|
|        | Average (%)         | SEM  | Number of MEA | Average (%)        | SEM  | Number of MEA | Average (%)           | SEM  | Number of MEA | Average (%)               | SEM  | Number of MEA |
| Day 4  | 21.4                | 11.4 | 3             | 16.4               | 6.5  | 5             | 130.0                 | 15.1 | 3             | 73.9                      | 59.8 | 5             |
| Day 6  | 67.5                | 24.8 | 5             | 45.2               | 40.3 | 7             | 145.4                 | 10.0 | 5             | 102.5                     | 52.2 | 6             |
| Day 8  | 49.2                | 17.0 | 2             | 38.7               | 19.3 | 6             | 83.0                  | 4.9  | 4             | 55.2                      | 6.3  | 5             |
| Day 10 | 59.4                | 12.1 | 3             | 22.9               | 5.1  | 6             | 135.0                 | 21.5 | 4             | 119.3                     | 8.6  | 4             |
| Day 12 | 45.5                | 10.8 | 3             | 29.9               | 1.0  | 3             | 81.8                  | 21.0 | 5             | 175.6                     | 5.5  | 5             |

### The Conduction Velocity (cm/s) for 12 Days

**D**

| Day    | $\mu\text{M}$ (20%) |      |               | $\mu\text{M}$ (2%) |      |               | $\mu\text{C}$ Gelatin |       |               | $\mu\text{C}$ Fibronectin |      |               |
|--------|---------------------|------|---------------|--------------------|------|---------------|-----------------------|-------|---------------|---------------------------|------|---------------|
|        | Average (cm/s)      | SEM  | Number of MEA | Average (cm/s)     | SEM  | Number of MEA | Average (cm/s)        | SEM   | Number of MEA | Average (cm/s)            | SEM  | Number of MEA |
| Day 4  | 23.5                | 0.19 | 4             | 25.4               | 5.70 | 6             | 3.1                   | 0.72  | 3             | 6.9                       | 2.98 | 6             |
| Day 6  | 24.1                | 5.91 | 5             | 26.9               | 5.23 | 7             | 15.8                  | 3.23  | 7             | 6.4                       | 1.66 | 6             |
| Day 8  | 30.2                | 2.93 | 3             | 18.5               | 4.96 | 3             | 17.3                  | 10.36 | 7             | 13.1                      | 3.19 | 8             |
| Day 10 | 15.6                | 0.84 | 3             | 21.2               | 3.78 | 7             | 8.1                   | 1.47  | 6             | 19.2                      | 4.73 | 7             |
| Day 12 | 16.8                | 0.76 | 3             | 17.4               | 0.47 | 3             | 10.9                  | 3.81  | 8             | 10.6                      | 3.41 | 6             |

**Supplementary Table 1. Electrophysiological recordings over 12 days of culture for all conditions.** The average readouts on each day and the number of MEA replicates were used for A) the beating rate (Hz), B) the beating interval (s), C) the coefficient of variation (%), and D) the conduction velocity (cm/s).

**Supplementary Movie 1:** Bright field MEA video of anisotropic cardiac monolayer beating on top of  $\mu\text{C}$  fibronectin coating from day 4 of culture.

**Supplementary Movie 2:** Bright field MEA video of anisotropic cardiac monolayer beating on top  $\mu\text{M}$  2% gelatin hydrogel from day 4 of culture.

**Supplementary Movie 3:** Field potential propagation across the MEA from  $\mu\text{C}$  fibronectin condition on day 4 of culture. Red color in the propagation map denotes early detection of the field potential, and blue color denotes late detection of the field potential.

**Supplementary Movie 4:** Field potential propagation across the MEA from  $\mu\text{M}$  2% condition on day 4 of culture. Red color in the propagation map denotes early detection of the field potential, and blue color denotes late detection of the field potential.
